# Supplementary material for: The separation characteristics and performance evaluation of the silica-based poly(pentabromostyrene) stationary phase in capillary electrochromatography
Source: Royal Society of Chemistry journal article supplement (doi:10.1039/d1ay01594j), 2021-01-01
Supplement: d1ay01594j1.pdf [file d1ay01594j1.pdf]

1  
2  
3  
4  
5  
6  
7  
8  
9  
10  
11  
12  
13  
14  
15  
16  
17  
18  
19  
20  
21

## **Supplementary information**

### **The separation characteristics and performance evaluation of the silica-based poly(pentabromostyrene) stationary phase in capillary electrochromatography**

Zhихua Zhong, Zhanying Chu, Ziyi Dong, Weibing Zhang\*, Lingyi Zhang\*

Shanghai Key Laboratory of Functional Materials Chemistry, School of Chemistry and  
Molecular Engineering, East China University of Science and Technology, Shanghai,  
200237, PR China

#### **\*Corresponding author**

Prof. Weibing Zhang

School of Chemistry and Molecular Engineering  
East China University of Science and Technology  
Shanghai, 200237, PR China

E-mail: [weibingzhang@ecust.edu.cn](mailto:weibingzhang@ecust.edu.cn)

Dr. Lingyi Zhang

School of Chemistry and Molecular Engineering  
East China University of Science and Technology  
Shanghai, 200237, PR China

E-mail: [zhanglingyi@ecust.edu.cn](mailto:zhanglingyi@ecust.edu.cn)

## 22 1. Synthesis of pentabromostyrene

23 1.6 g of  $\text{FeBr}_3$  and 56 mL of  $\text{Br}_2$  were added into a round-bottom flask in an ice bath.  
24 16.4 mL of (2-bromoethyl)benzene was added dropwise under magnetic stirring and  
25 the reaction had continued for 24 h. Dichloromethane was added and the solution was  
26 washed thoroughly with sodium sulfite solution (1 mol/L). Then the organic phase was  
27 evaporated to obtain a white product, which is (2-bromoethyl)pentabromobenzene.  
28 Then, 25 g of the obtained (2-bromoethyl)pentabromobenzene and 200 mL of ethyl  
29 alcohol (EtOH) were refluxed at 86 °C for 2 h after the addition of 20 mL of KOH  
30 solution in EtOH (0.13 g/mL). The mixture was filtered, washed with water and dried  
31 in the oven to get the product pentabromostyrene.

32 The poly(pentabromostyrene) bonded silica ( $\text{SiO}_2@\text{pPBS}$ ) was synthesized by a  
33 surface-initiated free-radical polymerization procedure. Firstly, 10 g of activated silica  
34 and 12 g of APTES were dispersed into 100 mL of toluene in a round-bottom flask and  
35 refluxed at 110 °C for 24 h. The solid product (named as  $\text{SiO}_2@\text{NH}_2$ ) was washed with  
36 MeOH and dispersed into 100 mL of DMF solution containing 7.5 g of EEDQ and 4.2  
37 g of ACV. The mixture was stirred for 12 h at room temperature. The white product  
38 ( $\text{SiO}_2@\text{ACV}$ ) was washed with DMF and  $\text{CH}_2\text{Cl}_2$  subsequently and dried at 25 °C in  
39 the oven. Finally, 3 g of  $\text{SiO}_2@\text{ACV}$  and pentabromostyrene were dispersed into 30  
40 mL of EGMME and this reaction took place under refluxing at 70 °C for 24 h. The final  
41 product ( $\text{SiO}_2@\text{pPBS}$ ) was washed with EtOH and then dried in the oven at 60 °C.

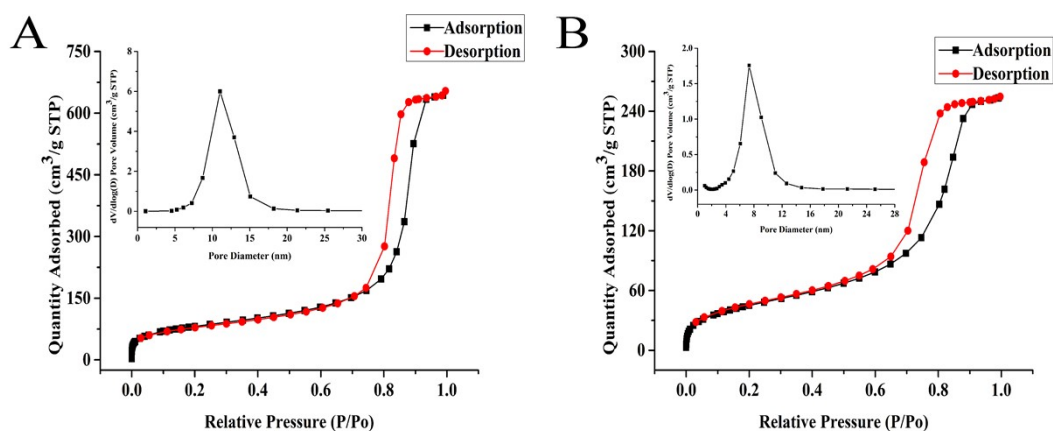

42

43 **Fig. S1**  $\text{N}_2$  adsorption/desorption experimental results of  $\text{SiO}_2$  (A) and  $\text{SiO}_2@\text{pPBS}$  (B).

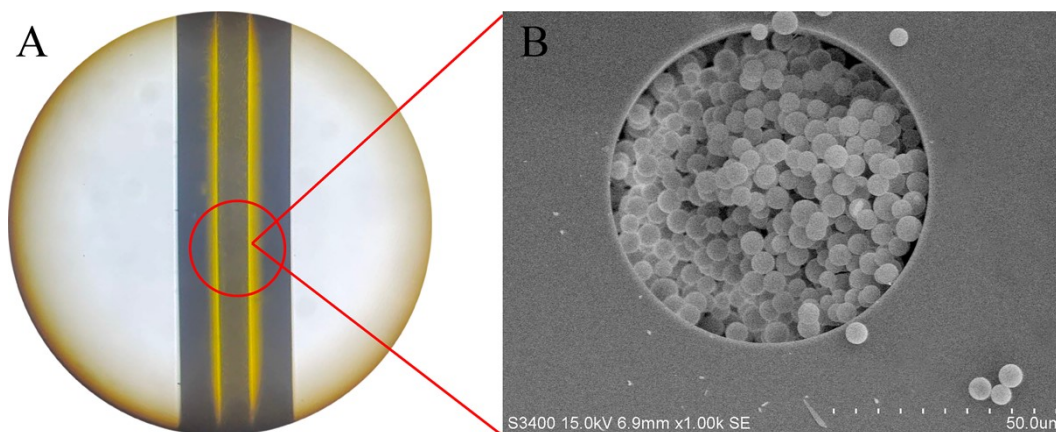

44

45 **Fig. S2** The optical microscope image (A) and SEM image (B) of SiO<sub>2</sub>@pPBS capillary  
 46 packed column.

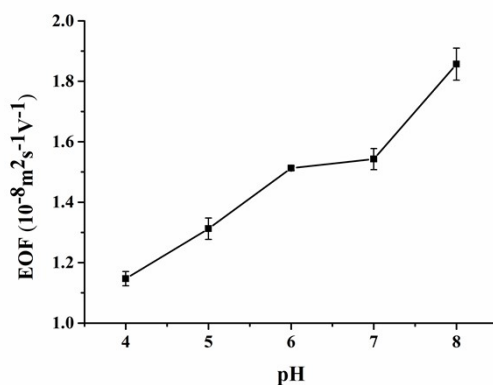

47

48 **Fig. S3** The influence of buffer pH on the EOF mobility of SiO<sub>2</sub>@pPBS capillary packed  
 49 column. Conditions: 40 cm capillary (22 cm effective length)  $\times$  75  $\mu\text{m}$  i.d.; mobile phase, 5  
 50 mmol/L phosphate buffer with 60% ACN; applied voltage, 15 kV; injection, 5 kV  $\times$  5 s;  
 51 detection wavelength, 214 nm.

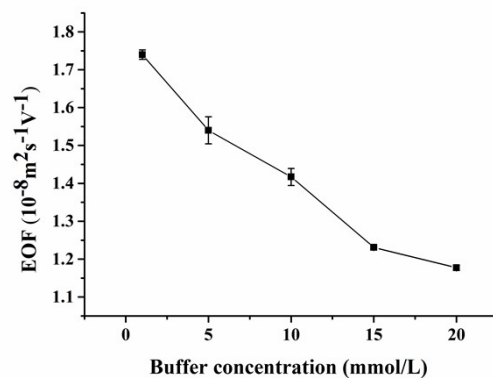

52

53 **Fig. S4** The influence of buffer concentration on the EOF mobility of SiO<sub>2</sub>@pPBS capillary  
 54 packed column. Conditions: mobile phase, phosphate buffer with 60% ACN at pH 7; other

55 conditions were same as Fig. S3.

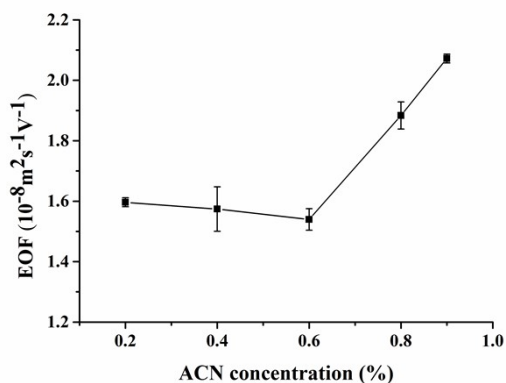

56

57 **Fig. S5** The influence of ACN concentration on the EOF mobility of  $\text{SiO}_2@\text{pPBS}$  capillary  
58 packed column. Conditions: mobile phase, 5 mmol/L phosphate buffer at pH 7; other  
59 conditions were same as Fig. S3.

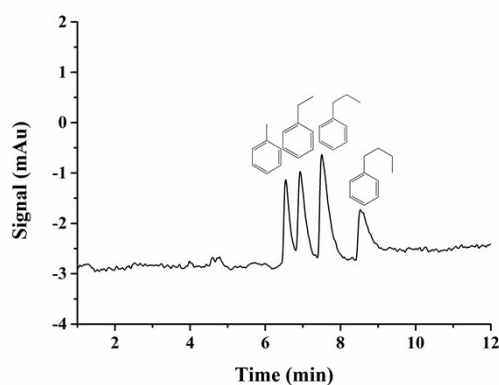

60

61 **Fig. S6** Electrochromatogram of alkylbenzenes. Conditions: mobile phase, 5 mmol/L  
62 phosphate buffer with 60% ACN at pH 7; other conditions were same as Fig. S3.

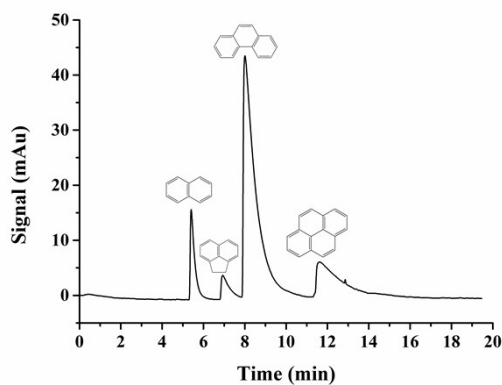

63

64 **Fig. S7** Electrochromatogram of polycyclic aromatic hydrocarbons. Conditions: mobile  
65 phase, 5 mmol/L phosphate buffer with 90% ACN at pH 7; other conditions were same as Fig.

66 S3.

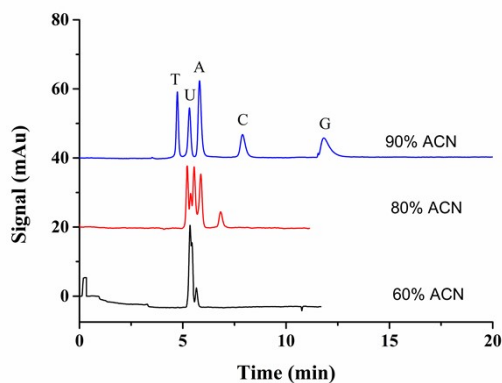

67

68 **Fig. S8** Electrochromatograms of five nucleosides under different ACN concentration.

69 Conditions: mobile phase, 5 mmol/L phosphate buffer at pH 7; other conditions were same as

70 Fig. S3.

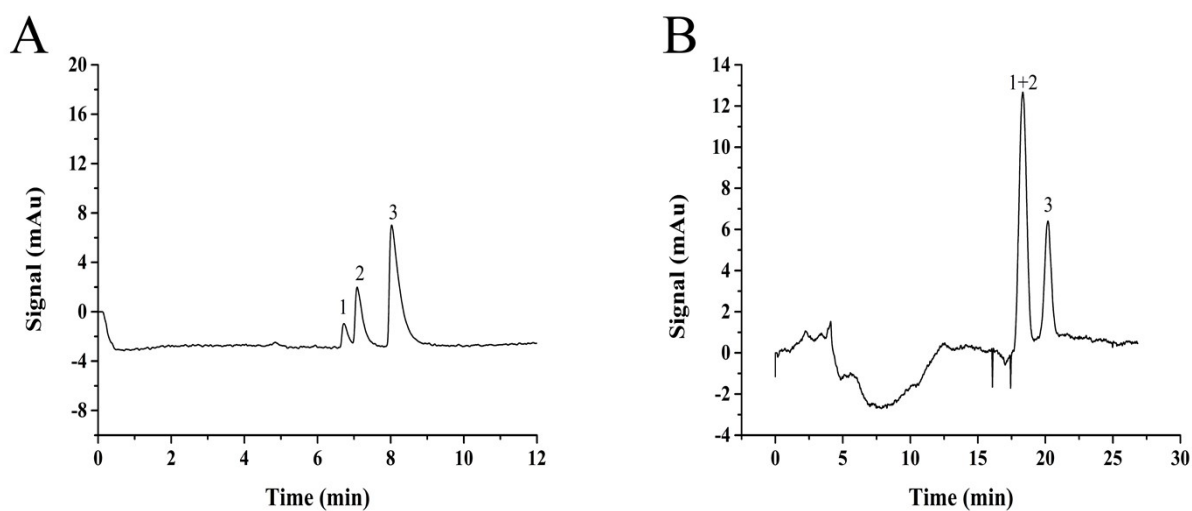

71

72 **Fig. S9** The chromatographic selectivity comparison of (A) SiO<sub>2</sub>@pPBS capillary packed

73 column and (B) C18 column. Conditions: (A) mobile phase: 5 mmol/L phosphate buffer with 80%

74 ACN at pH 7; (B) mobile phase: 5 mmol/L phosphate buffer with 60% ACN at pH 7; other

75 conditions were same as Fig. S3. Analytes: 1. Toluene, 2. Chlorobenzene, 3. Bromobenzene.

76

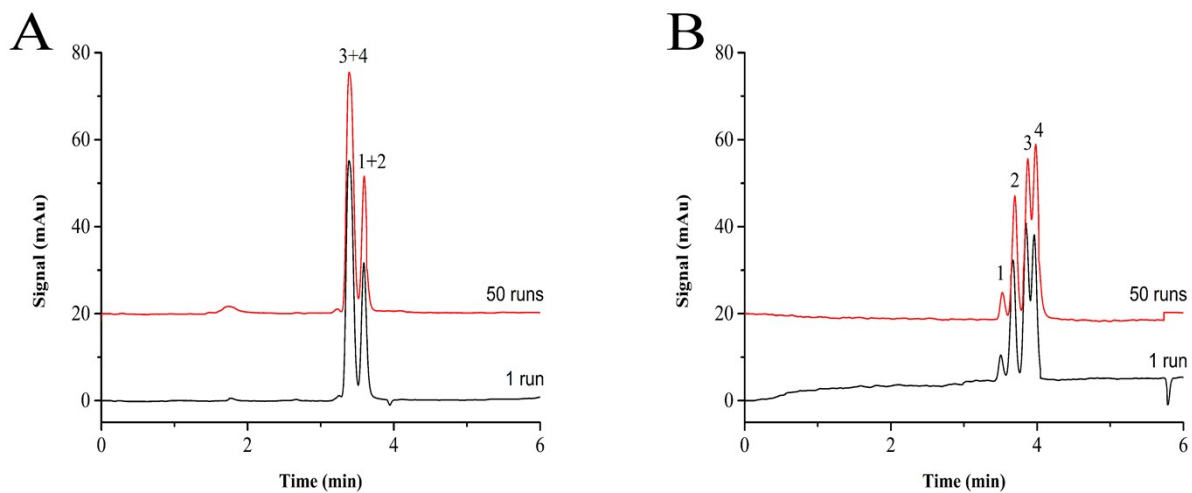

77

78 **Fig. S10** Evaluation of stability of SiO<sub>2</sub>@pPBS capillary packed column at pH4 (A) and pH  
 79 7 (B). Conditions: 5 mmol/L phosphate buffer with 40% ACN, other conditions were same as  
 80 Fig. S3. Analytes: 1. Acetone, 2. Thiourea, 3. Sulphanilamide, 4. Sulfaguanidine.
